# Supplementary material for: Early Evaluation of Patients on Axial Flow Pump Support for Refractory Cardiogenic Shock Is Associated with Left Ventricular Recovery
Source: PubMed Central journal article supplement (PMC7767477; doi:10.3390/jcm9124130), 2020-12-21
Supplement: jcm-09-04130-s001.pdf [file jcm-09-04130-s001.pdf]

**Table S1.** Thirty-day outcome according to the Impella device used (Impella CP® versus Impella 5.0®).

|                             | <b>Impella CP<br/>(n= 49, 79%)</b> | <b>Impella 5.0<br/>(n= 13, 21%)</b> | <b>p-value</b> |
|-----------------------------|------------------------------------|-------------------------------------|----------------|
| <i>Outcome at one month</i> |                                    |                                     |                |
| Death - no. (%)             | 15 (31)                            | 7 (54)                              | 0.12           |
| LVAD - no. (%)              | 9 (18)                             | 3 (23)                              | 0.70           |
| Heart transplant - no. (%)  | 3 (6)                              | 0 (0)                               | 0.36           |

**Table S2.** Results of the univariate and multivariate Cox regression analysis on admission parameters to predict the occurrence of mortality, LVAD or heart transplant at 30 days.

|                                | Univariate analysis |             | Multivariate analysis (n=61) |             |
|--------------------------------|---------------------|-------------|------------------------------|-------------|
|                                | OR (95% CI)         | P-value     | OR (95% CI)                  | P-value     |
| LVEF (for each additional %)   | 0.96 [0.91 - 1.02]  | 0.24        | 0.95 [0.89 - 1.02]           | 0.20        |
| MBP (for each additional mmHg) | 0.96 [0.92 - 0.99]  | <b>0.04</b> | 0.96 [0.92 - 1.01]           | 0.09        |
| Dobutamine                     | 3.12 [1.08 - 8.97]  | <b>0.03</b> | 3.25 [1.04 - 10.1]           | <b>0.04</b> |

P-value corresponds to the results of the Wald test. In bold, p-value<0.05; CI: confidence interval; LVEF: left ventricular ejection fraction; MBP: mean blood pressure; OR: odds ratio.

**Table S3.** Comparison with other Impella registries.

|                                                    | <b>Toulouse (n=62)</b> | <b>CARDSHOCK (n= 219)</b> | <b>cVAD<br/>(n= 287)</b> | <b>IMP-IT<br/>(n= 229)</b> |
|----------------------------------------------------|------------------------|---------------------------|--------------------------|----------------------------|
| Age – yrs.                                         | 58 ± 11                | 67 ± 12                   | 66                       | 64 ± 13                    |
| Male Gender - no. (%)                              | 55 (89)                | 162 (74)                  | 219 (76)                 | 167 (73)                   |
| Body Mass Index - kg/m <sup>2</sup>                | 25.9 ± 4.0             | 26.5 (24.2–29.0)          |                          |                            |
| History of coronary artery disease - no. (%)       | 11 (18)                | 76 (35)                   | 199 (69)                 | 152 (66)                   |
| Acute coronary syndrome - no. (%)                  | 57 (92)                | 177 (81)                  | 287 (100)                | 172 (75)                   |
| SBP at placement, mmHg                             | 101 ± 21               | 78 ± 14                   | 96 ± 28                  |                            |
| DBP at placement, mmHg                             | 67 ± 13                | 47 ± 10                   | 58 ± 21                  |                            |
| MBP at placement, mmHg                             | 78 ± 15                | 57 ± 11                   | 72 ± 22                  | 64 ± 20                    |
| Heart rate at placement, bpm                       | 107 ± 20               | 90 ± 28                   | 93 ± 33                  | 94 ± 24                    |
| Sinus rhythm at placement - no. (%)                | 56 (90)                | 170 (78)                  |                          |                            |
| Cardiac arrest prior to Impella support            | 6 (10)                 | 62 (28)                   | 58 (40)                  | 51 (24)                    |
| Mechanical ventilation                             | 43 (69)                |                           | 218 (77)                 | 165 (76)                   |
| RRT                                                | 15 (24)                |                           |                          | 62 (27)                    |
| LVEF                                               | 22 ± 9.0               | 33 ± 14                   | 25 ± 13                  | 25 ± 12                    |
| Cardiac index                                      | 1.9 ± 0.6              | 2.1 ± 0.8                 |                          |                            |
| Moderate to severe MR                              | 17 (27)                | 73 (35)                   |                          |                            |
| pH                                                 | 7.37 ± 0.14            | 7.30 (7.20–7.40)          |                          |                            |
| Arterial lactates - mmol/l                         | 3.1 ± 2.1              | 2.8 [1.7–5.8]             | 4.3 ± 1.1                | 6.1 ± 4.8                  |
| Serum creatinine - μmol/l                          | 117 ± 53               | 104 (78–140)              | 150 ± 114                |                            |
| Total bilirubin - μmol/l                           | 11.2 [7.2–17.7]        |                           | 20.4 ± 57.8              |                            |
| Inotrope or vasopressor prior to Impella – no. (%) | 50 (81)                |                           | 230 (80)                 |                            |
| Dobutamine prior to Impella                        | 37 (60)                |                           |                          | 155 (75)                   |

|                      |         |         |                  |
|----------------------|---------|---------|------------------|
| ECMO                 | 16 (26) | 16 (26) | 66 (29)          |
| IABP                 | 9 (15)  |         | 114 (40) 79 (36) |
| Pre-PCI Impella      | 12 (22) |         | 46% 77 (36)      |
| 2.5                  | 0 (0)   |         | 57% 134 (59)     |
| 3.5                  | 49 (79) |         | 42% 84 (37)      |
| 5.0                  | 13 (21) |         | 1% 2 (0.8)       |
| Access-site bleeding | 31 (50) |         | 25 (11)          |
| Severe bleeding      | 9 (11)  |         | 36 (16)          |
| Limb ischemia        | 8 (13)  |         | 29 (13)          |
| Sepsis               | 30 (48) |         | 70 (35)          |

\*CARDSHOCK is a global cardiogenic shock registry, does not focus on Impella. DBP: diastolic blood pressure; IABP : intra-aortic balloon pump; oxygenation; LVEF: left ventricle ejection fraction ; MR: mitral regurgitation; MBP: mean blood pressure; PCI: percutaneous coronary intervention; RRT: renal replacement therapy ; SBP: systolic blood pressure; VA-ECMO: veno-arterial extracorporeal membrane oxygenation.
